# Supplementary material for: Cisplatin contributes to programmed death-ligand 1 expression in bladder cancer through ERK1/2-AP-1 signaling pathway
Source: PubMed Central journal article supplement (PMC6783655; doi:10.1042/bsr20190362), 2019-09-06
Supplement: bsr20190362_Supp1.pdf [file bsr20190362_Supp1.pdf]

Supplementary information

Figure S1

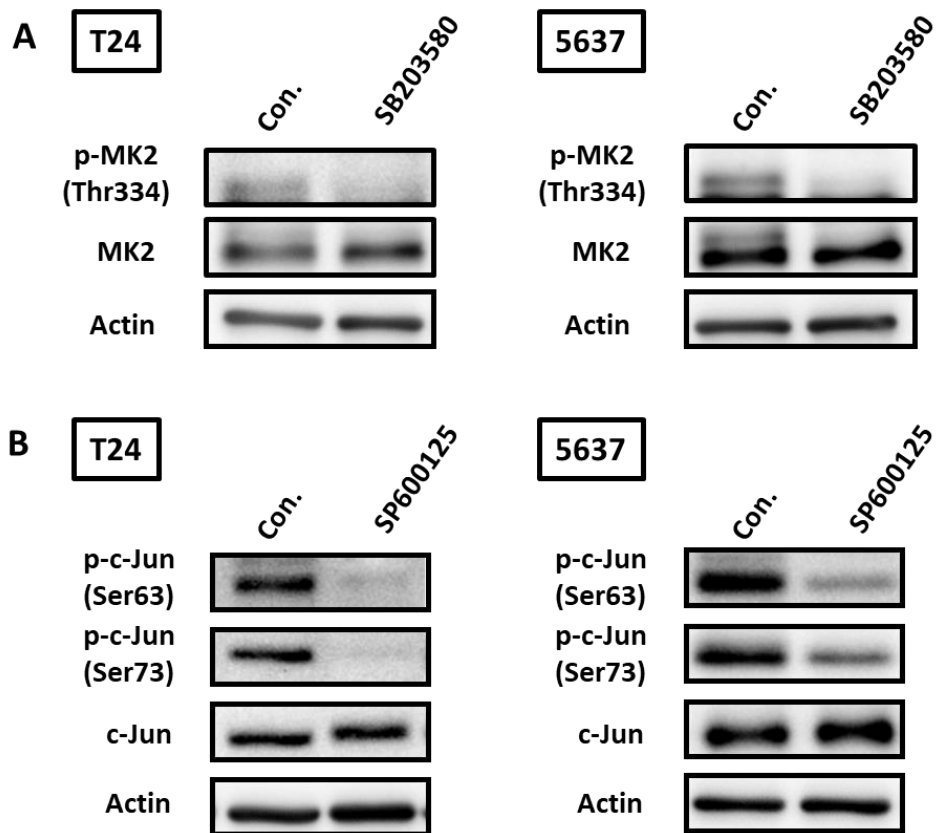

**Figure S1. The efficacy tests of p38 and JNK inhibitors.** (A and B) The BC-derived cell lines were incubated with SB203580 (10  $\mu$ M) or SP600125 (10  $\mu$ M) for 24 h. The cell lysates were collected and phosphorylation of MK2 and c-Jun were conducted by Western blot respectively.
